# Supplementary material for: Hierarchical engineering of Mn2O3/carbon nanostructured electrodes for sensitive screening of acetylcholine in biological samples
Source: Royal Society of Chemistry journal article supplement (doi:10.1039/d2nj02390c), 2022-01-01
Supplement: d2nj02390c1.pdf [file d2nj02390c1.pdf]

## Supporting information

### **Hierarchical Engineering of Mn<sub>2</sub>O<sub>3</sub>/Carbon Nanostructured Electrodes for Sensitive Screening of Acetylcholine in Biological Sample**

M. Y. Emran<sup>a,b</sup>, M. A. Shenashen<sup>a,c</sup>, A. Elmarakbi<sup>d</sup>, M. M. Selim<sup>e</sup>, S. A. El-Safty<sup>a,\*</sup>

<sup>a</sup> National Institute for Materials Science (NIMS), Research Center for Functional Materials, 1-2-1 Sengen, Tsukuba-shi, Ibaraki-ken 305-0047, Japan.

<sup>b</sup> Chemistry Department, Faculty of Science, Al-Azhar University, Assiut 71524, Egypt

<sup>c</sup> Department of Petrochemical, Egyptian Petroleum Research Institute (EPRI), Cairo 11727, Egypt

<sup>d</sup> Faculty of Engineering and Environment, Northumbria University, Newcastle upon Tyne, NE1 8ST, UK.

<sup>e</sup> Al-Aflaj College of Science and Human Studies, Prince Sattam Bin Abdulaziz University, Al-Aflaj, 710-11912, Saudi Arabia.

\*Correspondence: [sherif.elsafty@nims.go.jp](mailto:sherif.elsafty@nims.go.jp)

Homepage: [https://samurai.nims.go.jp/profiles/sherif\\_elsafty](https://samurai.nims.go.jp/profiles/sherif_elsafty)

## Experimental section

### 1.1 Materials

All chemicals were of analytical grade and were used without further purification. Sodium Dopamine hydrochloride, potassium permanganate ( $\text{KMnO}_4$ ), adrenaline, noradrenaline, uric acid (UA), tryptophane, guanine, glucose (gl), potassium ferricyanide [ $\text{K}_3\text{Fe}(\text{CN})_6$ ], human blood serum, and potassium chloride (KCl) were purchased from Sigma-Aldrich Company, Ltd., USA. L(+)-ascorbic acid (AA), adenine, and sodium citrate were purchased from Wako C2.3

### 1.2 Electrochemical detection of ACh on $\text{Mn}_2\text{O}_3\text{NLS/C/GCE}$ and $\text{Mn}_2\text{O}_3\text{FL/C/GCE}$

The ACh concentrations were detected using a nonenzymatic-based sensor of  $\text{Mn}_2\text{O}_3\text{NLS/C/GCE}$  and  $\text{Mn}_2\text{O}_3\text{FL/C/GCE}$ . The electrochemical measurements were set using three-electrode systems with  $\text{Mn}_2\text{O}_3\text{NLS/C/GCE}$ ,  $\text{Mn}_2\text{O}_3\text{FL/C/GCE}$ , and GCE as the working electrodes, Ag/AgCl (3 M NaCl) as the reference electrode, and Pt wire as the counter electrode. The supporting electrolyte was 0.1 M NaOH. Various electrochemical techniques, such as CV, electrochemical impedance spectroscopy (EIS), and chronoamperometry (CA), were set and performed using a Zahner/Zennium electrochemical workstation (Thales Z 2.0 software). ompany, Ltd., Osaka, Japan.

### 1.2 Characterization analyses

The architectonic configurations and geometrics of of  $\text{Mn}_2\text{O}_3$  materials and electrodes are investigated by using a wide range of advanced techniques such as X-ray diffraction (XRD) using an 18 kW diffractometer (Bruker D8 Advance X-ray diffractometer), and field emission-type scanning electron microscope FE-SEM (JEOL JSM-Model 7000F, JEOL Ltd). The various heterogeneous composites and surface topologies and parameters of  $\text{Mn}_2\text{O}_3\text{NLS/C}$  and  $\text{Mn}_2\text{O}_3\text{FL/C}$  were investigated using X-ray photoelectron spectroscopy (XPS) (PHI Quantera SXM (ULVAC-PHI) instrument (Perkin-Elmer Co., USA)), Fourier transform-infrared (FT-IR) and Raman spectroscopy (HR Micro Raman spectrometer, Horiba, Jobin Yvon). The Raman shift spectra were performed at a power of 0.5 eV, laser wavelength  $\lambda = 532$  nm, scanning for 10 times, and time exposure of 10 s in range of  $450 - 2800 \text{ cm}^{-1}$ .

## 3. Results and discussions

### Electrode surface area

The  $\text{Mn}_2\text{O}_3\text{NLS/C/GCE}$ ,  $\text{Mn}_2\text{O}_3\text{FL/C/GCE}$ , and GCE surface areas were explored based on the Randles-Sevick equation <sup>1</sup>:

$$I_p(\text{A}) = 2.69 \times 10^5 n^{3/2} A_0 D_0^{1/2} C_0 v^{1/2}$$

Where,  $I_p$  is the anodic current value (A),  $n$  denotes the electron transfer,  $D$  represents the diffusion coefficient ( $\text{cm}^2 \text{ s}^{-1}$ ),  $C_0$  refers to the [ $\text{K}_3\text{Fe}(\text{CN})_6$ ] concentration ( $\text{mol cm}^{-3}$ ),  $v$  is the scan rate value ( $\text{Vs}^{-1}$ ), and  $A$  is the electrode surface area ( $\text{cm}^2$ ).

Figures

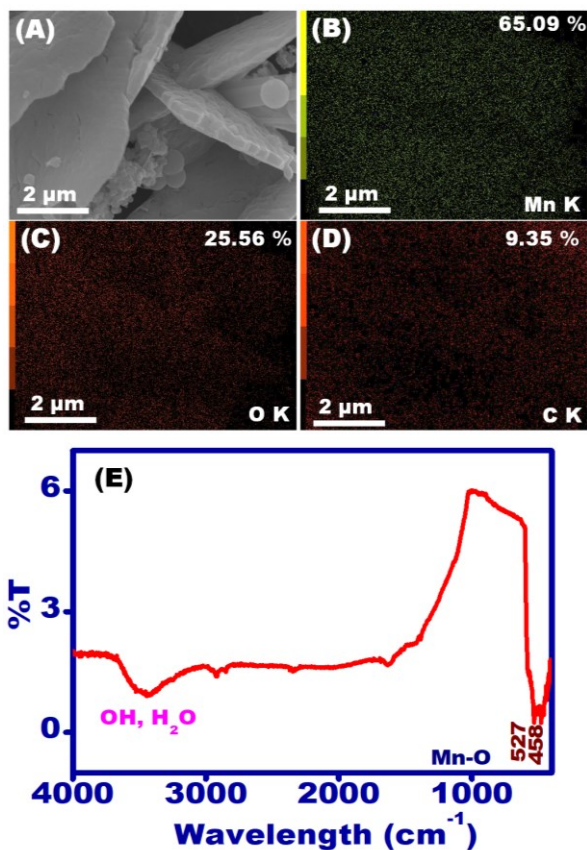

Figure S1. A) The EDX-SEM mapping of Mn (B), O (C), and C (D). E) the FT-IR of  $\text{Mn}_2\text{O}_3/\text{C}$ .

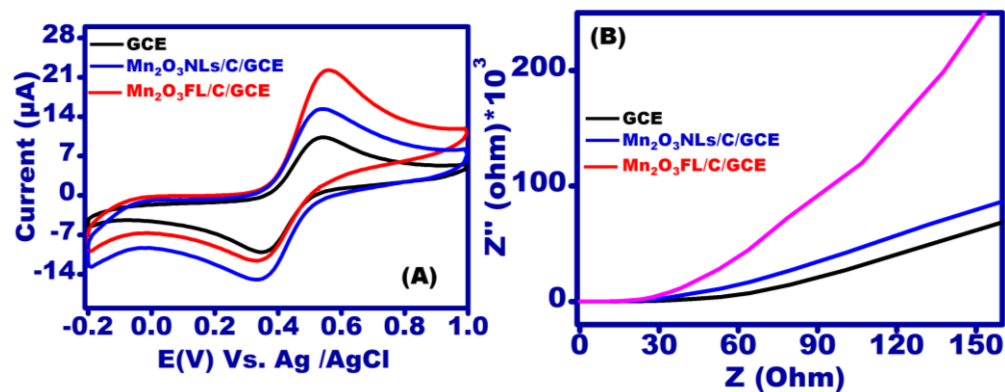

Figure S2. The CVs (A) and impedance spectroscopy (-Nyquist plot) (B) of GCE (black line),  $\text{Mn}_2\text{O}_3\text{NLs}/\text{C}/\text{GCE}$  (blue line), and  $\text{Mn}_2\text{O}_3\text{FL}/\text{C}/\text{GCE}$  (Red line) in 0.1 M KCl containing 1 mM  $[\text{Fe}(\text{CN})_6]^{3-/4-}$  at scan rate of  $100 \text{ mVs}^{-1}$ .

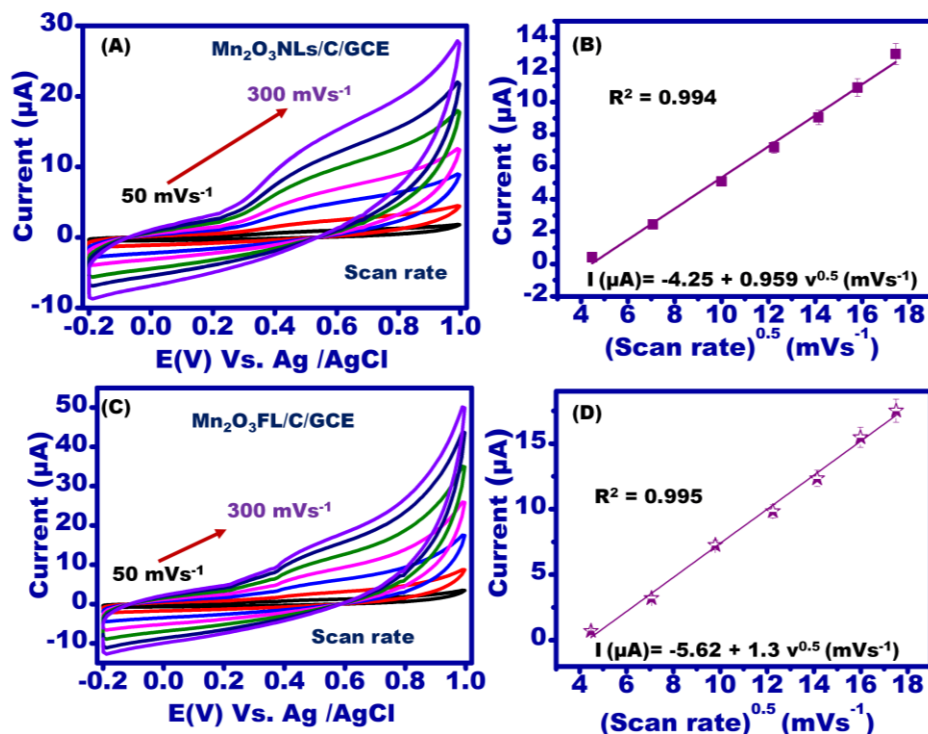

**Figure S3.** The CVs of 1.5 mM ACh in 0.1 M NaOH at various scan rates of 50–300  $\text{mVs}^{-1}$  using  $\text{Mn}_2\text{O}_3\text{NLs/Cs/GCE}$  (A) and  $\text{Mn}_2\text{O}_3\text{FL/C/GCE}$ . B) The plot of square root of scan rate ( $\text{mVs}^{-1}$ ) versus the relevant current ( $\mu\text{A}$ ) for  $\text{Mn}_2\text{O}_3\text{NLs/C/GCE}$  (C) and  $\text{Mn}_2\text{O}_3\text{FL/C/GCE}$  (D).

**Table S1.** The comparison of various electrode design materials and the designed materials of  $\text{Mn}_2\text{O}_3\text{NLs/C}$  and  $\text{Mn}_2\text{O}_3\text{FL/C}$  on the bases of linear range and limit of detection (LOD) ( $\mu\text{M}$ ).

| <i>Electrode materials</i>                      | <i>Linear range</i><br>( $\mu\text{M}$ ) | <i>LOD</i><br>( $\mu\text{M}$ ) | <i>Ref</i> |
|-------------------------------------------------|------------------------------------------|---------------------------------|------------|
| <i>Ni–Al LDHs/OMC/GC</i>                        | 2–4922                                   | 0.042                           | 2          |
| <i>NiAl-LDH/CD composites</i>                   | 5 – 6885                                 | 1.7                             | 3          |
| <i>hollow nickel microspheres/<br/>carbon</i>   | 0.24 – 828                               | 0.049                           | 4          |
| <i>copper nanoparticles</i>                     | 120–2680                                 | 39                              | 5          |
| <i>Cu@Cu<sub>2</sub>O-BNDC</i>                  | 0.3 – 2602                               | 17                              | 6          |
| <i>nickel oxide nanostructure</i>               | 250 – 5880                               | 26.7                            | 7          |
| <i>CuCo<sub>2</sub>O<sub>4</sub> nanoplates</i> | 0.2 – 3500                               | 0.03                            | 8          |
| <i>MCSNP/SPE</i>                                | 0.1–500                                  | 0.02                            | 9          |
| <i>Mn<sub>2</sub>O<sub>3</sub>NLs/C</i>         | 100 – 7000                               | 7                               | Current    |
| <i>Mn<sub>2</sub>O<sub>3</sub>FL/C</i>          | 100 – 6500                               | 2                               | work       |

## References

1. D. Buttry and A. Bard, *Electroanalytical chemistry*, 1991, **17**.
2. J. Ju, J. Bai, X. Bo, L. Guo, *Electrochim. acta*, 2012, **78**, 569-575.
3. L. Wang, X. Chen, C. Liu, W. Yang, *Sens. Actuators B: Chem.*, 2016, **233**, 199-205.
4. N. Sattarahmady, H. Heli, A. Moosavi-Movahedi, *Biosens. Bioelectron.*, 2010, **25**, 2329-2335.
5. H. Heli, M. Hajjizadeh, A. Jabbari, A.A. Moosavi-Movahedi, *Biosens. Bioelectron.*, 2009, **24**, 2328-2333.
6. P. Balasubramanian, T. Balamurugan, S.-M. Chen, T.-W. Chen, T. Sathesh, *ACS Sust. Chem. Eng.*, 2018, **7**, 5669-5680.
7. N. Sattarahmady, H. Heli, R.D. Vais, *Biosens. Bioelectron.*, 2013, **48**, 197-202.
8. P. Balasubramanian, T.S.T. Balamurugan, S.-M. Chen, T.-W. Chen, *ACS Sust. Chem. Eng.*, 2019, **7**, 7642-7651.
9. S.Z. Mohammadi, H. Beitollahi, S. Tajik, *Micro & Nano Syst. Lett.*, 2018, **6**, 1-7.
